# Supplementary material for: Transcriptomic Analysis of Pichia pastoris (Komagataella phaffii) GS115 During Heterologous Protein Production Using a High-Cell-Density Fed-Batch Cultivation Strategy
Source: Front Microbiol. 2020 Mar 20;11:463. doi: 10.3389/fmicb.2020.00463 (PMC7098997; doi:10.3389/fmicb.2020.00463)
Supplement: Supplementary file 2 [file Table_1.xlsx]

## Sheet: Table S1
Table S1 the related proteins involved in carbon metabolism and oxidative stress metabolic pathway
Gene_ID	Protein name	Hit to CBS7435_ORF	Description	Pathway	G_3vsB_10_log2FoldChange	G_3vsB_10_pvalue	GM_2vsB_10_log2FoldChange	GM_2vsB_10_pvalue	M_12vsB_10_log2FoldChange	M_12vsB_10_pvalue	M_24vsB_10_log2FoldChange	M_24vsB_10_pvalue	M_36vsB_10_log2FoldChange	M_36vsB_10_pvalue	M_48vsB_10_log2FoldChange	M_48vsB_10_pvalue	M_60vsB_10_log2FoldChange	M_60vsB_10_pvalue	M_72vsB_10_log2FoldChange	M_72vsB_10_pvalue	M_84vsB_10_log2FoldChange	M_84vsB_10_pvalue	M_96vsB_10_log2FoldChange	M_96vsB_10_pvalue	M_108vsB_10_log2FoldChange	M_108vsB_10_pvalue	M_120vsB_10_log2FoldChange	M_120vsB_10_pvalue
PAS_chr4_0821	AOX1	PP7435_Chr4-0130	Alcohol oxidase	Methane metabolism||Metabolic pathways||Carbon metabolism	1.75513	3.60222e-05	6.31186	2.3125e-34	11.0528	1.1498e-69	10.7762	1.3917e-67	10.8012	9.28131e-68	10.8427	4.44764e-68	10.6981	5.4026e-67	11.1261	3.35685e-70	11.0191	1.45939e-69	11.1102	4.38877e-70	11.2753	2.46662e-71	11.5054	4.77849e-73
PAS_chr2-2_0131	CAT	PP7435_Chr2-0137	Catalase A, breaks down hydrogen peroxide in the peroxisomal matrix formed by acyl-CoA oxidase (Pox1	Tryptophan metabolism||Glyoxylate and dicarboxylate metabolism||Carbon metabolism||MAPK signaling pathway - yeast||Peroxisome	1.07861	0.00932404	2.01314	2.25338e-06	3.6262	1.54769e-15	3.50496	9.24505e-15	3.59547	2.44006e-15	3.73341	3.12486e-16	3.60727	2.04922e-15	3.79664	1.20635e-16	3.69449	5.59751e-16	3.67531	7.45297e-16	3.82949	7.34134e-17	3.7841	1.45771e-16
PAS_chr3_1028	FLD	PP7435_Chr3-0140	S-(hydroxymethyl)glutathione dehydrogenase	Glycolysis / Gluconeogenesis||Fatty acid degradation||Tyrosine metabolism||Methane metabolism||Metabolic pathways||Carbon metabolism	0.246962	0.547761	3.02413	8.54145e-12	4.80616	1.58993e-23	4.26066	9.53522e-20	4.40141	1.0377e-20	4.47009	3.49124e-21	4.25483	1.04482e-19	4.62935	2.7445e-22	4.73846	4.74871e-23	4.59347	4.87553e-22	4.80529	1.61201e-23	4.5233	1.4962e-21
PAS_chr3_0867	FGH	PP7435_Chr3-0312	Non-essential intracellular esterase that can function as an S-formylglutathione hydrolase	Methane metabolism||Carbon metabolism	0.739011	0.0744269	3.11339	2.61379e-12	5.95659	8.86747e-32	5.65249	1.45065e-29	5.56538	6.17502e-29	5.53506	1.02372e-28	5.50001	1.83856e-28	5.69075	7.62507e-30	5.61739	2.61268e-29	5.53757	9.77164e-29	5.67515	9.89741e-30	5.55821	6.93995e-29
PAS_chr3_0932	FDH	PP7435_Chr3-0238	NAD(+)-dependent formate dehydrogenase, may protect cells from exogenous formate	Glyoxylate and dicarboxylate metabolism||Methane metabolism||Metabolic pathways||Carbon metabolism	1.56943	0.000194031	8.12264	8.01339e-48	8.8209	4.67648e-53	8.41534	5.12096e-50	8.56369	3.942e-51	8.55305	4.74106e-51	8.59156	2.45178e-51	8.85475	2.59799e-53	8.7663	1.20976e-52	8.89906	1.2008e-53	9.02775	1.31109e-54	9.27113	1.94899e-56
PAS_chr3_0832	DAS1	PP7435_Chr3-0352	Transketolase, similar to Tkl2p	Methane metabolism||Carbon metabolism	0.0757124	0.856441	4.38802	1.36368e-20	8.64655	9.45903e-52	8.40159	6.49231e-50	8.34521	1.70041e-49	8.45362	2.62848e-50	8.37211	1.07796e-49	8.66605	6.72581e-52	8.55733	4.45709e-51	8.52166	8.04183e-51	8.72304	2.51635e-52	8.60893	1.79137e-51
PAS_chr3_0834	DAS2	PP7435_Chr3-0350	Transketolase, similar to Tkl2p	Methane metabolism||Carbon metabolism	0.424808	0.306887	6.5833	2.28737e-36	9.52148	2.58201e-58	9.26044	2.367e-56	9.22791	4.10252e-56	9.31886	8.53812e-57	9.2696	2.01751e-56	9.52603	2.37128e-58	9.40464	1.97597e-57	9.28199	2.22044e-56	9.49294	4.20318e-58	9.29807	1.66897e-56
PAS_chr3_0841	DAK	PP7435_Chr3-0343	Dihydroxyacetone kinase, required for detoxification of dihydroxyacetone (DHA)	Fructose and mannose metabolism||Glycerolipid metabolism||Methane metabolism||Metabolic pathways||Carbon metabolism	0.179748	0.661622	1.82626	1.58942e-05	3.63067	1.45367e-15	3.36607	6.97156e-14	3.38983	4.94971e-14	3.47845	1.36723e-14	3.34722	9.14172e-14	3.53829	5.69091e-15	3.45357	1.96487e-14	3.34453	9.50397e-14	3.57037	3.54845e-15	3.29405	1.95655e-13
PAS_chr4_0783	GUT1	PP7435_Chr4-0173	Glycerol kinase, converts glycerol to glycerol-3-phosphate	Glycerolipid metabolism||Metabolic pathways	-0.383159	0.350925	0.564404	0.170127	-4.75396	3.80748e-23	-3.76279	2.04168e-16	-3.81057	9.9773e-17	-4.02128	4.01191e-18	-4.20114	2.46288e-19	-4.58705	5.57206e-22	-4.67623	1.31882e-22	-4.58138	6.14935e-22	-4.52177	1.57829e-21	-4.7526	3.9292e-23
PAS_chr2-1_0437	GPD	PP7435_Chr2-0858	Glyceraldehyde-3-phosphate dehydrogenase, isozyme 3, involved in glycolysis and gluconeogenesis	Glycolysis / Gluconeogenesis||Metabolic pathways||Carbon metabolism||Biosynthesis of amino acids	-0.293996	0.473844	-0.991012	0.0166936	-1.81656	1.74359e-05	-1.39179	0.000864299	-1.58349	0.000162855	-1.82348	1.62657e-05	-1.47782	0.000416675	-1.41558	0.00070868	-1.62762	0.000108469	-1.37331	0.00100682	-1.55988	0.000201716	-1.29256	0.00192598
PAS_chr1-4_0292	PGK	PP7435_Chr1-1075	3-phosphoglycerate kinase	Glycolysis / Gluconeogenesis||Metabolic pathways||Carbon metabolism||Biosynthesis of amino acids	-0.48311	0.239932	-1.26875	0.00232047	-2.25648	1.47956e-07	-1.80477	1.96662e-05	-1.70828	5.07025e-05	-1.74163	3.67026e-05	-1.71617	4.69702e-05	-1.48941	0.000377409	-1.76038	3.05266e-05	-1.49452	0.000361088	-1.65424	8.47712e-05	-1.63988	9.70109e-05
PAS_chr3_0693	TPM	PP7435_Chr3-0506	Tetrameric phosphoglycerate mutase	Glycolysis / Gluconeogenesis||Glycine, serine and threonine metabolism||Methane metabolism||Metabolic pathways||Carbon metabolism||Biosynthesis of amino acids	0.78306	0.0591877	-0.570254	0.169704	-0.47128	0.257328	0.172336	0.678075	0.100157	0.810316	-0.242232	0.560411	0.660661	0.111184	0.0914474	0.826703	0.24248	0.558388	0.498904	0.22926	0.3062	0.460333	0.688872	0.0971388
PAS_chr3_0082	ENOI	PP7435_Chr3-1154	Enolase I, a phosphopyruvate hydratase that catalyzes the conversion of 2-phosphoglycerate to phosph	Glycolysis / Gluconeogenesis||Methane metabolism||Metabolic pathways||Carbon metabolism||Biosynthesis of amino acids||RNA degradation	-0.171186	0.676502	-1.26164	0.00245133	-1.75862	3.10727e-05	-1.1748	0.00470934	-1.36342	0.00109312	-1.50386	0.00033256	-1.53818	0.000245401	-1.17084	0.00484858	-1.43144	0.000620621	-1.14897	0.00568225	-1.39996	0.00080877	-1.29534	0.00188685
PAS_chr2-1_0769	PK	PP7435_Chr2-0503	Pyruvate kinase	Glycolysis / Gluconeogenesis||Purine metabolism||Pyruvate metabolism||Metabolic pathways||Carbon metabolism||Biosynthesis of amino acids	-0.216141	0.598422	-1.4912	0.000371717	-1.56595	0.000191634	-1.28566	0.00203733	-1.47255	0.000437625	-1.47953	0.000411943	-1.65838	8.16583e-05	-1.31159	0.00166164	-1.37901	0.000962731	-1.32972	0.00143863	-1.51015	0.000315284	-1.40953	0.000748135
PAS_chr3_0868	FBPI	PP7435_Chr3-0309	Fructose-1,6-bisphosphatase, key regulatory enzyme in the gluconeogenesis pathway	Glycolysis / Gluconeogenesis||Pentose phosphate pathway||Fructose and mannose metabolism||Methane metabolism||Metabolic pathways||Carbon metabolism	-0.434612	0.290658	0.2324	0.571478	2.17378	3.82887e-07	1.8404	1.37831e-05	1.40406	0.000784423	1.36088	0.00112001	1.52882	0.000267678	1.99631	2.71188e-06	1.79999	2.06921e-05	1.98302	3.12753e-06	1.90438	7.15253e-06	2.20838	2.5826e-07
PAS_chr1-1_0072	FBAII (FBA1-1)	PP7435_Chr1-0374	Fructose 1,6-bisphosphate aldolase, required for glycolysis and gluconeogenesis	Glycolysis / Gluconeogenesis||Pentose phosphate pathway||Fructose and mannose metabolism||Methane metabolism||Metabolic pathways||Carbon metabolism||Biosynthesis of amino acids	-0.417815	0.309175	-1.23847	0.0029267	-1.50862	0.000318739	-1.16371	0.00510435	-1.19699	0.00399818	-1.43343	0.000610154	-1.51975	0.000288898	-1.14246	0.00595087	-1.37822	0.000967427	-1.25027	0.00267596	-1.33432	0.0013831	-1.43083	0.000623876
PAS_chr1-1_0319	FBA1-2	PP7435_Chr1-0639	Fructose 1,6-bisphosphate aldolase, required for glycolysis and gluconeogenesis	NA	0.578495	0.171383	2.70101	9.86266e-10	8.34135	3.88085e-49	8.31634	6.02365e-49	8.38942	1.79489e-49	8.29453	8.98336e-49	8.38186	1.97529e-49	8.50224	2.46755e-50	8.36762	2.35507e-49	8.2523	1.96095e-48	8.4404	7.23571e-50	8.48311	3.58535e-50
PAS_chr1-4_0047	FPK1	PP7435_Chr1-0820	Beta subunit of heterooctameric phosphofructokinase involved in glycolysis	Glycolysis / Gluconeogenesis||Pentose phosphate pathway||Fructose and mannose metabolism||Galactose metabolism||Methane metabolism||Metabolic pathways||Carbon metabolism||Biosynthesis of amino acids||RNA degradation	0.394954	0.336552	-0.696961	0.0909984	-0.587326	0.153886	-0.224306	0.584969	-0.406795	0.322503	-0.316763	0.44079	-0.448465	0.275541	-0.121068	0.768169	-0.193375	0.637706	-0.047389	0.908244	-0.156745	0.702721	-0.281349	0.493508
PAS_chr3_0456	GPI	PP7435_Chr3-0754	Glycolytic enzyme phosphoglucose isomerase	Glycolysis / Gluconeogenesis||Pentose phosphate pathway||Starch and sucrose metabolism||Amino sugar and nucleotide sugar metabolism||Metabolic pathways||Carbon metabolism	0.0819295	0.841737	0.0844979	0.836839	-1.05191	0.0111937	-0.366785	0.371921	-0.523054	0.203549	-0.576607	0.161248	-0.709946	0.085071	-0.539035	0.190151	-0.49175	0.231751	-0.507149	0.217582	-0.51643	0.209302	-0.722279	0.0798629
PAS_chr1-4_0150	TK	PP7435_Chr1-0919	Transketolase, similar to Tkl2p	Pentose phosphate pathway||Metabolic pathways||Carbon metabolism||Biosynthesis of amino acids	-0.42028	0.306427	-1.0222	0.0136366	-2.48436	9.77186e-09	-2.4319	1.85313e-08	-2.56536	3.57927e-09	-2.63849	1.42049e-09	-2.56621	3.53327e-09	-2.69013	7.33899e-10	-2.82247	1.29942e-10	-2.52346	6.05367e-09	-2.78044	2.27155e-10	-2.92947	3.14497e-11
PAS_chr2-2_0337	TAL (TAL1-1)	PP7435_Chr2-0357	Transaldolase, enzyme in the non-oxidative pentose phosphate pathway	Pentose phosphate pathway||Metabolic pathways||Carbon metabolism||Biosynthesis of amino acids	-0.308937	0.451814	-0.475405	0.247532	-0.948041	0.0219773	-1.11168	0.00741539	-1.11545	0.00722396	-1.18452	0.0043936	-1.31267	0.00164806	-1.21458	0.00351469	-1.22546	0.00323618	-1.16715	0.00499154	-1.05258	0.0111419	-1.22098	0.00335097
PAS_chr2-2_0338	TAL1-2	PP7435_Chr2-0358	Transaldolase, enzyme in the non-oxidative pentose phosphate pathway	Pentose phosphate pathway||Metabolic pathways||Carbon metabolism||Biosynthesis of amino acids	-0.183808	0.665004	1.53156	0.00030776	6.68714	6.3191e-37	6.21233	1.93428e-33	6.31106	3.72556e-34	6.4978	1.60916e-35	6.24951	1.03163e-33	6.6138	2.20475e-36	6.58941	3.31266e-36	6.44878	3.83773e-35	6.64243	1.40809e-36	6.26125	8.83346e-34
PAS_chr4_0212	RKI (RKI1-2)	PP7435_Chr4-1807	Ribose-5-phosphate ketol-isomerase	Pentose phosphate pathway||Metabolic pathways||Carbon metabolism||Biosynthesis of amino acids	-0.23605	0.575304	1.22231	0.00363326	5.54329	1.26845e-28	5.08253	2.57753e-25	5.18847	4.57682e-26	5.35731	2.83734e-27	5.12804	1.21931e-25	5.3873	1.7064e-27	5.45569	5.31143e-28	5.24308	1.85412e-26	5.3735	2.17573e-27	5.14078	1.01927e-25
PAS_chr4_0213	RKI1-1	PP7435_Chr4-1796	Ribose-5-phosphate ketol-isomerase	Pentose phosphate pathway||Metabolic pathways||Carbon metabolism||Biosynthesis of amino acids	-0.303837	0.460889	-0.515887	0.211113	1.02097	0.0139149	0.647822	0.116581	0.807818	0.0508744	0.854254	0.03907	0.72033	0.0812631	0.846956	0.0407607	0.831561	0.044445	0.835376	0.0436015	0.911343	0.0278556	0.744247	0.0718369
PAS_chr3_1045	PEX1	PP7435_Chr3-0122	AAA-peroxin that heterodimerizes with AAA-peroxin Pex6p and participates in the recycling of peroxisomal signal receptor Pex5p from the peroxisomal membrane to the cystosol; induced in S. cerevisiae by oleic acid and upregulated during anaerobiosis	Peroxisome	0.236774	0.566164	1.29211	0.00198289	2.52394	6.18301e-09	2.22717	2.15916e-07	2.16115	4.59202e-07	2.199	2.9872e-07	1.92123	6.21282e-06	2.26232	1.44127e-07	2.19268	3.19997e-07	2.1862	3.467e-07	2.26904	1.33283e-07	2.24838	1.69682e-07
PAS_chr3_0043	PEX2	PP7435_Chr3-1201	peroxisomal integral membrane protein	Peroxisome	-0.216114	0.600727	0.663694	0.10825	2.05401	1.50101e-06	1.85556	1.21769e-05	1.98856	3.04615e-06	1.97487	3.52344e-06	1.84063	1.41747e-05	1.9977	2.76273e-06	1.8429	1.38291e-05	1.82319	1.69816e-05	1.93651	5.28547e-06	1.75255	3.41931e-05
PAS_chr3_1073	PEX3	PP7435_Chr3-0092	Peroxisomal membrane protein (PMP)	Peroxisome	0.192418	0.641134	0.368272	0.371953	2.41795	2.2681e-08	2.04082	1.73663e-06	2.07887	1.14818e-06	2.09322	9.7975e-07	1.97372	3.57266e-06	2.20901	2.66392e-07	2.0856	1.06209e-06	2.08311	1.09875e-06	2.27838	1.19436e-07	2.15899	4.71004e-07
PAS_chr2-2_0186	PEX5	PP7435_Chr2-0195	Peroxisomal membrane signal receptor for the C-terminal tripeptide signal sequence (PTS1)	Peroxisome	-0.487823	0.237758	1.71358	4.9417e-05	4.12896	7.6098e-19	3.92826	1.68024e-17	4.03843	3.09125e-18	4.12424	8.18719e-19	3.66781	8.5909e-16	4.09737	1.24215e-18	4.00024	5.57485e-18	3.86367	4.49495e-17	4.17347	3.8045e-19	3.67515	7.6993e-16
PAS_chr1-4_0133	PEX6	PP7435_Chr1-0900	AAA-peroxin that heterodimerizes with AAA-peroxin Pex1p	Peroxisome	-0.0806613	0.846311	1.28605	0.00209845	3.54071	5.77143e-15	3.22563	5.44477e-13	3.31522	1.52402e-13	3.35894	8.13583e-14	3.23246	4.94407e-13	3.47238	1.57129e-14	3.43946	2.53696e-14	3.35753	8.31084e-14	3.51982	7.84616e-15	3.36771	7.17498e-14
PAS_chr4_0759	PEX12	PP7435_Chr4-0200	C3HC4-type RING-finger peroxisomal membrane peroxin	Peroxisome	0.170607	0.680764	0.462006	0.264131	2.62364	1.819e-09	2.10679	8.65068e-07	2.31995	7.55521e-08	2.52157	6.56315e-09	2.25307	1.64698e-07	2.58456	2.98689e-09	2.49135	9.49721e-09	2.5744	3.40566e-09	2.51014	7.56701e-09	2.49493	9.15326e-09
PAS_chr2-2_0207	PEX13	PP7435_Chr2-0217	Integral peroxisomal membrane required for the translocation of peroxisomal matrix proteins	Peroxisome	-0.113685	0.783039	1.04012	0.0122654	3.21729	5.95922e-13	2.92214	3.49677e-11	3.20187	7.40797e-13	3.22764	5.15e-13	2.93973	2.75855e-11	3.37261	6.50218e-14	3.35653	8.19285e-14	3.2099	6.61994e-13	3.49977	1.02518e-14	3.25229	3.63421e-13
PAS_chr4_0794	PEX14	PP7435_Chr4-0157	Peroxisomal membrane peroxin that is a central component of the peroxisomal protein import machinery; interacts with both PTS1 (Pex5p) and PTS2 (Pex7p), peroxisomal matrix protein signal recognition factors and membrane receptor Pex13p	Peroxisome	0.556129	0.17758	0.785659	0.0574336	3.2586	3.31061e-13	2.90041	4.66792e-11	2.99639	1.27514e-11	3.09838	3.13583e-12	2.8558	8.47297e-11	3.09839	3.13597e-12	3.04516	6.53249e-12	2.99202	1.35479e-11	3.16923	1.16805e-12	2.90105	4.63474e-11
PAS_chr2-1_0715	PEX19	PP7435_Chr2-0563	PEX19; peroxisomal biogenesis protein	Peroxisome	-0.169935	0.680362	0.388512	0.345725	1.06168	0.0106389	0.81348	0.0493709	0.849209	0.0403474	0.863941	0.0370353	0.586784	0.155204	0.900047	0.0299141	0.933948	0.0242832	0.941075	0.0233188	0.894735	0.030881	1.00368	0.0156598
PAS_chr3_0099	PMP34 (PMP47)	PP7435_Chr3-1139	Mitochondrial NAD+ transporter, involved in the transport of NAD+ into the mitochondria (see also YE	Peroxisome	0.225655	0.585164	1.60288	0.000142022	5.71415	5.16654e-30	5.44146	4.86217e-28	5.7318	3.83918e-30	5.88322	3.03759e-31	5.95018	9.89243e-32	6.0785	1.13633e-32	5.91691	1.73632e-31	5.90863	1.97218e-31	6.03409	2.40153e-32	6.05017	1.82657e-32
PAS_chr1-1_0352	PXMP4	PP7435_Chr1-0670	similarity to potential peroxisomal protein Pmp4 [Candida albicans SC5314]	Peroxisome	-0.245599	0.554278	1.05361	0.0114448	-0.634436	0.128255	-0.341389	0.411578	-0.0509426	0.904145	0.00480291	0.992614	-0.503145	0.22674	-0.77525	0.0641421	-0.545348	0.189806	-0.45923	0.27114	-0.391176	0.347554	-0.419217	0.314667
PAS_chr1-4_0538	ACOX (POX1)	PP7435_Chr1-1341	Fatty-acyl coenzyme A oxidase	Fatty acid degradation||alpha-Linolenic acid metabolism||Biosynthesis of unsaturated fatty acids||Metabolic pathways||Fatty acid metabolism||Peroxisome	-0.286823	0.485103	2.50821	7.21646e-09	-0.0766352	0.85206	0.399938	0.330598	0.982395	0.0177056	0.968755	0.0193152	0.150181	0.714599	-0.516692	0.209447	-0.550528	0.18119	-0.389517	0.343589	-0.48473	0.238867	-0.496592	0.227664
PAS_chr2-2_0267	ACAA1 (POT1)	PP7435_Chr2-0278	3-ketoacyl-CoA thiolase with broad chain length specificity	Fatty acid degradation||Valine, leucine and isoleucine degradation||alpha-Linolenic acid metabolism||Biosynthesis of unsaturated fatty acids||Metabolic pathways||Fatty acid metabolism||Peroxisome	-0.37677	0.359386	2.79755	1.78831e-10	0.25719	0.531241	0.352332	0.391242	0.942052	0.0228478	1.05581	0.0109154	0.266043	0.517202	-0.227304	0.580097	-0.261415	0.52456	-0.231356	0.573427	-0.251848	0.539922	-0.364338	0.375576
PAS_chr3_0975	PDCR (SPS19)	PP7435_Chr3-0194	Peroxisomal 2,4-dienoyl-CoA reductase, auxiliary enzyme of fatty acid beta-oxidation	Peroxisome	0.267852	0.515994	3.72805	3.49834e-16	2.23125	2.05085e-07	2.14749	5.31547e-07	2.46458	1.27974e-08	2.36872	4.08392e-08	1.80686	1.98848e-05	1.78663	2.43708e-05	1.81312	1.86459e-05	1.98127	3.2961e-06	1.90666	7.20634e-06	1.90906	7.04017e-06
PAS_chr3_0822	ABCD1 (PXA1)	PP7435_Chr3-0366	Subunit of a heterodimeric peroxisomal ATP-binding cassette transporter complex (Pxa1p-Pxa2p)	ABC transporters||Peroxisome	-0.356211	0.388776	1.97462	3.5309e-06	0.501335	0.225006	1.12957	0.006691	1.63454	0.000105806	1.47725	0.000434011	0.814591	0.0493286	0.419165	0.310306	0.488057	0.237242	0.80144	0.0532368	0.561947	0.174089	0.824376	0.0468092
PAS_chr2-2_0272	ABCD2 (PXA2)	PP7435_Chr2-0283	Subunit of a heterodimeric peroxisomal ATP-binding cassette transporter complex (Pxa1p-Pxa2p)	ABC transporters||Peroxisome	-0.678279	0.102134	1.78948	2.3802e-05	0.182555	0.65906	0.401837	0.330793	0.834394	0.0442912	0.874198	0.0351805	0.0921276	0.824307	-0.136917	0.741499	-0.0618617	0.881865	0.0744634	0.858142	0.00443919	0.992669	0.254508	0.538478
PAS_chr4_0352	ACSL2 (FAA2)	PP7435_Chr4-0642	Long chain fatty acyl-CoA synthetase	Fatty acid biosynthesis||Fatty acid degradation||Metabolic pathways||Fatty acid metabolism||Peroxisome	-0.368711	0.369724	2.40974	2.40753e-08	-0.95729	0.0208473	-0.661522	0.108624	-0.2781	0.498562	-0.313609	0.445438	-1.04503	0.0117891	-2.01453	2.29549e-06	-2.31347	7.84082e-08	-2.16165	4.5804e-07	-2.14811	5.29564e-07	-2.28434	1.12113e-07
PAS_chr2-1_0785	ACSL1(FAA1)	PP7435_Chr2-0484	Long chain fatty acyl-CoA synthetase with a preference for C12:0-C16:0 fatty acids	Fatty acid biosynthesis||Fatty acid degradation||Metabolic pathways||Fatty acid metabolism||Peroxisome	0.48541	0.237775	1.00783	0.0149786	1.07337	0.00966245	1.13646	0.006215	1.23011	0.00312142	1.20223	0.0038479	0.973451	0.0187053	1.21128	0.00359664	1.22728	0.00318828	1.37882	0.000963621	1.42271	0.000668325	1.60005	0.000140167
PAS_chr3_0218	DGA1	PP7435_Chr3-1009	Diacylglycerol acyltransferase	Glycerolipid metabolism	1.18925	0.0043498	0.458809	0.26644	0.673136	0.103899	0.585568	0.156747	0.60698	0.14238	0.603804	0.144438	0.538958	0.192316	0.8124	0.0500909	0.757141	0.0674967	1.13362	0.00654841	0.628851	0.128623	0.683496	0.0988876
PAS_chr1-4_0314	ERG20	PP7435_Chr1-1100	Farnesyl pyrophosphate synthetase	Terpenoid backbone biosynthesis||Metabolic pathways	-0.145196	0.724038	-1.45132	0.000536659	-0.0251482	0.951542	0.268316	0.514041	0.17555	0.669475	0.000246284	0.999863	0.271962	0.508352	0.425535	0.30115	0.163303	0.691206	0.204448	0.619155	0.61392	0.136433	0.66782	0.105488
PAS_chr2-1_0878	LRO1	PP7435_Chr2-0587	hypothetical protein	Glycerolipid metabolism||Metabolic pathways	0.389341	0.344757	-0.325128	0.430286	-1.06703	0.0104982	-0.631685	0.12681	-0.63976	0.122289	-0.587009	0.155926	-0.203346	0.622123	-0.971044	0.0196727	-0.763724	0.0652884	-1.09125	0.00898499	-0.980938	0.0184788	-1.3487	0.00132792
PAS_chr2-1_0458	PEX20	PP7435_Chr2-0838	Peroxin 20	--	0.222952	0.596682	0.284827	0.498754	2.60126	3.08437e-09	2.24213	2.30351e-07	2.07203	1.54513e-06	2.09794	1.17061e-06	1.91063	8.48981e-06	2.10881	1.0348e-06	2.09271	1.21813e-06	2.37616	4.99625e-08	2.13214	8.20175e-07	2.36626	5.62628e-08
PAS_chr1-4_0433	PEX7	PP7435_Chr1-1228	Peroxisomal signal receptor for the N-terminal nonapeptide signal of peroxisomal matrix proteins	Peroxisome	0.0146841	0.973792	0.917378	0.0275698	0.268737	0.518473	0.656585	0.114244	0.940934	0.0241039	0.969056	0.0202174	0.377423	0.36377	0.519164	0.211898	0.660952	0.111663	0.587436	0.158283	0.675828	0.104349	0.719316	0.0841456
PAS_chr1-4_0547	PMP20	PP7435_Chr1-1351	peroxiredoxin	--	0.000617675	1	3.36945	9.76871e-14	9.16337	2.27508e-55	8.97569	5.73308e-54	9.12857	4.18505e-55	9.21111	9.92846e-56	9.27736	3.09449e-56	9.55859	2.47427e-58	9.4225	2.44724e-57	9.58386	1.6292e-58	9.6263	7.61621e-59	9.81196	3.14892e-60
PAS_chr1-1_0174	PIM1-2	PP7435_Chr1-0484	ATP-dependent Lon protease involved in degradation of misfolded proteins in mitochondria	--	0.674065	0.103363	1.91443	6.69682e-06	4.1671	4.25936e-19	3.83924	6.61626e-17	3.80225	1.15795e-16	3.99532	6.09098e-18	3.76773	1.95064e-16	3.88548	3.27304e-17	3.85552	5.16997e-17	3.66957	8.49769e-16	3.83173	7.41038e-17	3.48805	1.24242e-14
PAS_chr2-1_0504	PEX11	PP7435_Chr2-0790	Peroxisomal membrane protein	--	0.268067	0.51562	2.89424	5.11004e-11	4.92483	2.35475e-24	4.52763	1.4252e-21	4.68025	1.23325e-22	4.85367	7.48237e-24	4.75575	3.65663e-23	5.03506	3.89407e-25	4.94332	1.74699e-24	4.99059	8.03715e-25	5.11956	9.75614e-26	5.15633	5.32667e-26
PAS_chr2-1_0776	FOX2	PP7435_Chr2-0495	Multifunctional enzyme of the peroxisomal fatty acid beta-oxidation pathway	--	-0.744305	0.0712366	2.10308	8.43064e-07	0.115098	0.779193	0.220252	0.591632	0.71597	0.0825085	0.80485	0.0512529	0.0536363	0.896089	-0.385245	0.34861	-0.32798	0.424646	-0.300168	0.465	-0.309977	0.450523	-0.558264	0.175102
PAS_chr2-2_0294	PDE1	PP7435_Chr2-0312	E1 alpha subunit of the pyruvate dehydrogenase (PDH) complex	Glycolysis / Gluconeogenesis||Citrate cycle (TCA cycle)||Pyruvate metabolism||Metabolic pathways||Carbon metabolism	-0.403111	0.326556	-0.387086	0.346082	-1.167	0.00499582	-1.04927	0.011393	-1.15235	0.00555595	-1.13978	0.00608017	-1.53375	0.000256147	-1.23503	0.00301391	-1.2455	0.00278068	-1.34406	0.00128394	-1.35449	0.00117908	-1.58093	0.000167791
PAS_chr1-4_0593	PDE1	PP7435_Chr1-1401	E1 beta subunit of the pyruvate dehydrogenase (PDH) complex	Glycolysis / Gluconeogenesis||Citrate cycle (TCA cycle)||Pyruvate metabolism||Metabolic pathways||Carbon metabolism	-0.426432	0.299456	-0.824723	0.0458213	-2.13729	5.81198e-07	-2.04007	1.69724e-06	-2.2016	2.81138e-07	-2.12223	6.88141e-07	-2.58418	2.82935e-09	-2.31528	7.52187e-08	-2.37342	3.75474e-08	-2.57553	3.17547e-09	-2.58321	2.87239e-09	-3.0095	1.06981e-11
PAS_chr1-1_0050	PDE2	PP7435_Chr1-0349	Dihydrolipoamide acetyltransferase component (E2) of pyruvate dehydrogenase complex	Glycolysis / Gluconeogenesis||Citrate cycle (TCA cycle)||Pyruvate metabolism||Metabolic pathways||Carbon metabolism	-0.140878	0.731405	-0.504167	0.220273	-1.3465	0.00126006	-1.19186	0.00416824	-1.26301	0.00243757	-1.29377	0.00191846	-1.35102	0.00121441	-1.30557	0.00174865	-1.33969	0.00132997	-1.41115	0.000741508	-1.38219	0.000942078	-1.38704	0.000905701
PAS_chr2-2_0048	DLD	PP7435_Chr2-0049	Dihydrolipoamide dehydrogenase	Glycolysis / Gluconeogenesis||Citrate cycle (TCA cycle)||Glycine, serine and threonine metabolism||Valine, leucine and isoleucine degradation||Pyruvate metabolism||Glyoxylate and dicarboxylate metabolism||Propanoate metabolism||Metabolic pathways||Carbon metabolism	-0.305412	0.457271	-0.524514	0.202489	-1.32918	0.00145821	-1.38286	0.00094231	-1.58801	0.000159319	-1.48582	0.000395121	-1.38933	0.000893528	-1.54539	0.000233999	-1.53145	0.000263836	-1.40284	0.000802034	-1.54752	0.000229576	-1.71744	4.74908e-05
PAS_chr1-1_0475	CTS	PP7435_Chr1-0426	hypothetical protein	Citrate cycle (TCA cycle)||Glyoxylate and dicarboxylate metabolism||Metabolic pathways||Carbon metabolism||2-Oxocarboxylic acid metabolism||Biosynthesis of amino acids	-0.382961	0.35132	1.1701	0.00487574	-0.00989684	0.980836	0.617074	0.133985	0.501234	0.222946	0.160124	0.696446	0.55005	0.181287	-0.134657	0.742876	-0.130171	0.751123	0.334337	0.415669	0.0434716	0.915691	0.0510921	0.900975
PAS_chr1-4_0487	SDH	PP7435_Chr1-1289	Putative protein of unknown function	Citrate cycle (TCA cycle)||Oxidative phosphorylation||Metabolic pathways||Carbon metabolism	0.0519953	0.899584	0.778935	0.0593148	0.317783	0.439814	0.312169	0.447883	0.17828	0.664731	0.194891	0.635634	0.468733	0.254901	-0.156708	0.703412	-0.0865019	0.833569	0.111295	0.786912	0.0115514	0.977953	0.15505	0.706314
PAS_chr2-2_0407	SCS1	PP7435_Chr2-0427	Beta subunit of succinyl-CoA ligase, which is a mitochondrial enzyme of the TCA cycle	Citrate cycle (TCA cycle)||Propanoate metabolism||Metabolic pathways||Carbon metabolism	-0.356593	0.385314	-0.538347	0.190674	-1.73855	3.80013e-05	-1.63741	9.96014e-05	-1.67726	6.85293e-05	-1.84305	1.34568e-05	-2.0722	1.19435e-06	-2.07437	1.16813e-06	-1.91631	6.32474e-06	-2.14302	5.4637e-07	-1.95333	4.30095e-06	-2.31107	7.90922e-08
PAS_chr3_0831	SCS2	PP7435_Chr3-0354	Alpha subunit of succinyl-CoA ligase	Citrate cycle (TCA cycle)||Propanoate metabolism||Metabolic pathways||Carbon metabolism	-0.298763	0.466975	0.09384	0.819167	-1.76162	3.05556e-05	-1.68594	6.34372e-05	-1.704	5.34982e-05	-1.79272	2.24929e-05	-1.99568	2.76382e-06	-1.92175	6.04991e-06	-1.94146	4.89873e-06	-1.96801	3.73328e-06	-2.04105	1.69979e-06	-2.24199	1.79638e-07
PAS_chr2-1_0238	MDH	PP7435_Chr2-1068	Mitochondrial malate dehydrogenase, catalyzes interconversion of malate and oxaloacetate	Citrate cycle (TCA cycle)||Cysteine and methionine metabolism||Pyruvate metabolism||Glyoxylate and dicarboxylate metabolism||Metabolic pathways||Carbon metabolism	-0.195953	0.63305	0.777199	0.0596234	0.396194	0.334899	0.303679	0.459553	0.233146	0.570049	0.257751	0.530096	0.151344	0.71228	0.126295	0.758272	0.189954	0.64347	0.163648	0.690087	0.25183	0.53958	0.166642	0.684716
PAS_chr1-3_0094	ODE	PP7435_Chr1-0095	Dihydrolipoyl transsuccinylase, component of the mitochondrial alpha-ketoglutarate dehydrogenase	Citrate cycle (TCA cycle)||Lysine degradation||Metabolic pathways||Carbon metabolism	-0.281654	0.492764	-0.406288	0.322826	-1.212	0.00359085	-1.09107	0.00857634	-1.31294	0.00164994	-1.37936	0.000964451	-1.02282	0.013608	-1.48431	0.000397141	-1.47343	0.000435553	-1.31274	0.00165426	-1.51539	0.000302571	-1.60153	0.000139555
PAS_chr1-1_0233	IDH	PP7435_Chr1-0546	Mitochondrial NADP-specific isocitrate dehydrogenase, catalyzes the oxidation of isocitrate	Citrate cycle (TCA cycle)||Glutathione metabolism||Metabolic pathways||Carbon metabolism||2-Oxocarboxylic acid metabolism||Biosynthesis of amino acids||Peroxisome	-0.476652	0.2465	-1.69557	5.77682e-05	-1.65785	8.29772e-05	-1.35182	0.00121057	-0.898972	0.0297875	-0.915319	0.0269791	-0.601671	0.144074	-0.642166	0.119187	-1.04111	0.0120656	-1.05859	0.010751	-0.992161	0.0166629	-0.676778	0.100728
PAS_chr1-1_0357	ADH	PP7435_Chr1-0675	NADPH-dependent medium chain alcohol dehydrogenase with broad substrate specificity	Glycolysis / Gluconeogenesis||Pentose and glucuronate interconversions||Glycerolipid metabolism||Metabolic pathways	-0.196458	0.639882	0.807341	0.0531324	-2.01494	5.46306e-06	-1.32037	0.00210169	-0.686027	0.104346	-0.810845	0.0560558	-0.60682	0.149884	-0.649667	0.12519	-0.844923	0.0458163	-1.02757	0.0163898	-1.06169	0.0130288	-1.02308	0.0168252
PAS_chr2-1_0249	PAS_chr2-1_0249	PP7435_Chr2-1055	Hypothetical protein, peroxisomal 2,4-dienoyl-CoA reductase	--	-0.154499	0.709709	3.46843	1.67343e-14	2.2747	1.2748e-07	2.48935	9.69361e-09	2.80367	1.75927e-10	2.93497	3.04985e-11	1.7955	2.28208e-05	1.94553	4.93259e-06	2.2611	1.48769e-07	2.09369	1.00184e-06	2.03657	1.865e-06	1.47651	0.000445535
PAS_FragB_0022	PAS_FragB_0022	PP7435_Chr1-1504	Delta(3,5)-Delta(2,4)-dienoyl-CoA isomerase, mitochondrial	--	-0.0493517	0.908343	2.19172	3.50604e-07	0.873017	0.0365495	0.776854	0.0628693	1.21466	0.00386946	1.30807	0.00189742	0.787607	0.0591257	0.6841	0.101598	0.72349	0.0826562	0.829471	0.0475499	0.629782	0.131417	0.685719	0.101004
PAS_chr1-1_0108	PAS_chr1-1_0108	PP7435_Chr1-0410	Hypothetical protein	--	-0.159403	0.698483	2.51907	6.37728e-09	0.165042	0.688363	0.0503743	0.902821	0.432984	0.293016	0.567736	0.168417	-0.270238	0.511521	-0.955327	0.0213865	-0.62272	0.131363	-0.526196	0.202293	-0.739639	0.0737589	-0.721758	0.0810054
