# Supplementary material for: Transcriptomic Analysis of Pichia pastoris (Komagataella phaffii) GS115 During Heterologous Protein Production Using a High-Cell-Density Fed-Batch Cultivation Strategy
Source: Front Microbiol. 2020 Mar 20;11:463. doi: 10.3389/fmicb.2020.00463 (PMC7098997; doi:10.3389/fmicb.2020.00463)
Supplement: Supplementary file 3 [file Table_2.xlsx]

## Sheet: Sheet1
Table S2 the related genes involved in cell growth and AOX1 promoter regulation
Gene_ID	Protein name	Hit to CBS7435_ORF	Description	Pathway	G_3vsB_10_log2FoldChange	G_3vsB_10_pvalue	GM_2vsB_10_log2FoldChange	GM_2vsB_10_pvalue	M_12vsB_10_log2FoldChange	M_12vsB_10_pvalue	M_24vsB_10_log2FoldChange	M_24vsB_10_pvalue	M_36vsB_10_log2FoldChange	M_36vsB_10_pvalue	M_48vsB_10_log2FoldChange	M_48vsB_10_pvalue	M_60vsB_10_log2FoldChange	M_60vsB_10_pvalue	M_72vsB_10_log2FoldChange	M_72vsB_10_pvalue	M_84vsB_10_log2FoldChange	M_84vsB_10_pvalue	M_96vsB_10_log2FoldChange	M_96vsB_10_pvalue	M_108vsB_10_log2FoldChange	M_108vsB_10_pvalue	M_120vsB_10_log2FoldChange	M_120vsB_10_pvalue
PAS_chr4_0821	AOX1	PP7435_Chr4-0130	Alcohol oxidase	Methane metabolism||Metabolic pathways||Carbon metabolism	1.75513	3.60222e-05	6.31186	2.3125e-34	11.0528	1.1498e-69	10.7762	1.3917e-67	10.8012	9.28131e-68	10.8427	4.44764e-68	10.6981	5.4026e-67	11.1261	3.35685e-70	11.0191	1.45939e-69	11.1102	4.38877e-70	11.2753	2.46662e-71	11.5054	4.77849e-73
PAS_chr4_0487	Mxr1	PP7435_Chr4-0490	Carbon source-responsive zinc-finger transcription factor	NA	0.0455763	0.911814	1.18586	0.00436049	0.333322	0.417487	0.20134	0.624149	0.303697	0.460039	0.369567	0.36879	0.327495	0.425639	0.284843	0.488331	0.302624	0.461529	0.169935	0.679308	0.417584	0.310022	0.100566	0.806792
PAS_chr2-1_0809	C4qzn3	PP7435_Chr2-1205	hypothetical protein	MAPK signaling pathway - yeast	-0.0165031	0.967985	-0.19094	0.641798	-0.312818	0.4463	-0.0658831	0.872502	-0.138246	0.736284	-0.237071	0.563676	-0.0992498	0.808942	-0.0883791	0.829546	-0.182697	0.656257	-0.105094	0.797961	-0.221566	0.589437	0.248127	0.545618
PAS_chr4_0203	Prm1	PP7435_Chr4-0805	Proposed transcriptional activator, member of the Gal4p family of zinc cluster proteins	NA	0.124951	0.761703	0.580064	0.159544	0.22749	0.58078	0.442338	0.28309	0.486274	0.23825	0.497611	0.227499	0.372795	0.365494	0.579204	0.160416	0.457943	0.266411	0.442344	0.283364	0.481536	0.242842	0.517339	0.209773
PAS_chr3_0836	Mit1	PP7435_Chr3-0349	Hypothetical protein	NA	0.970611	0.0191448	5.35884	1.87734e-27	3.25376	3.49306e-13	3.25659	3.35506e-13	3.4757	1.43242e-14	3.3367	1.07029e-13	3.20376	7.07956e-13	3.62115	1.68454e-15	3.45942	1.81588e-14	3.35209	8.58283e-14	3.96185	9.85692e-18	3.38514	5.33226e-14
PAS_chr3_0895	Slt2	PP7435_Chr3-0278	Serine/threonine MAP kinase	MAPK signaling pathway - yeast||Autophagy - yeast||Mitophagy - yeast	0.823111	0.0478984	0.560892	0.176466	1.77167	2.98414e-05	2.2788	1.25592e-07	2.02687	2.14409e-06	1.92181	6.53138e-06	2.12185	7.52753e-07	2.42252	2.283e-08	2.10377	9.16417e-07	1.727	4.65504e-05	1.80133	2.23115e-05	1.48788	0.000415647
PAS_chr1-1_0105	Pbs2	PP7435_Chr1-0407	MAP kinase kinase that plays a pivotal role in the osmosensing signal-transduction pathway	MAPK signaling pathway - yeast||Mitophagy - yeast	0.890171	0.0317122	0.921907	0.0261591	2.02646	2.01609e-06	1.65379	8.74693e-05	1.46283	0.000487877	1.62707	0.000112429	1.53001	0.000270936	1.70883	5.1958e-05	1.69586	5.86348e-05	1.90133	7.61112e-06	1.64854	9.20666e-05	1.55976	0.00020836
PAS_chr3_0469	Ste11	PP7435_Chr3-0738	Signal transducing MEK kinase	MAPK signaling pathway - yeast	0.195034	0.638291	0.335754	0.417367	1.57173	0.000193412	1.3184	0.00165584	1.3188	0.00165715	1.22788	0.00334171	0.945091	0.0231952	1.24852	0.00286116	1.30005	0.00190846	1.31088	0.00177261	1.15539	0.00569714	1.0632	0.0108561
PAS_chr1-4_0415	Wsc	PP7435_Chr1-1206	hypothetical protein	MAPK signaling pathway - yeast||Mitophagy - yeast	0.483314	0.241036	0.179032	0.663804	0.370958	0.368112	1.23127	0.00314673	1.18924	0.00431208	1.30268	0.00181502	1.18748	0.00436314	1.13416	0.00642596	1.3482	0.00125912	1.20962	0.00371357	1.25747	0.00258103	0.807027	0.0512138
PAS_chr3_0673	Wsc	PP7435_Chr3-0525	Sensor-transducer of the stress-activated PKC1-MPK1 kinase pathway	MAPK signaling pathway - yeast||Mitophagy - yeast	0.415408	0.314797	0.944196	0.0229968	1.43975	0.000603263	1.38608	0.000943342	1.15096	0.00579858	0.993887	0.0168858	0.942992	0.0232541	1.01098	0.0151233	1.13304	0.00656041	0.973281	0.0193224	1.03526	0.0128909	0.789426	0.0571205
PAS_chr3_0861	Ste3	PP7435_Chr3-1699	Receptor for a factor receptor, transcribed in alpha cells and required for mating by alpha cells	MAPK signaling pathway - yeast	0.0153202	0.978153	-0.16971	0.691437	0.507662	0.230106	0.582362	0.168469	1.04101	0.013948	0.806265	0.0568628	1.06739	0.0114923	1.25979	0.00298999	1.22534	0.00383905	1.20422	0.00463962	1.36561	0.00131053	1.37255	0.00127077
PAS_chr2-2_0033	Ypd1	PP7435_Chr2-0030	Phosphorelay intermediate protein, phosphorylated in S. cerevisiae by the plasma membrane sensor Sln1p in response to osmotic stress and then in turn phosphorylates the response regulators Ssk1p in the cytosol and Skn7p in the nucleus	MAPK signaling pathway - yeast	-0.0702565	0.865689	0.0178498	0.966385	1.6507	9.11227e-05	1.51477	0.000313009	1.19524	0.00417795	1.15883	0.00544764	0.936149	0.0241634	1.0135	0.0148085	1.36432	0.00111879	1.11907	0.00725336	1.12638	0.00687126	0.917935	0.0270978
PAS_chr3_0618	Msg5	PP7435_Chr3-0584	Dual-specificity protein phosphatase	MAPK signaling pathway - yeast	0.398989	0.334416	0.344721	0.404059	1.31978	0.0016184	1.13374	0.00654929	0.921669	0.0265947	0.82086	0.0479613	0.77539	0.0615163	1.12218	0.00712645	0.950684	0.0221538	0.855512	0.0394848	0.824087	0.0471182	0.775244	0.061756
PAS_chr3_0092	Tec1	PP7435_Chr3-1145	Transcription factor required for full Ty1 epxression, Ty1-mediated gene activation, and haploid inv	MAPK signaling pathway - yeast	0.45436	0.270081	0.46243	0.26161	1.48928	0.000384443	2.00897	2.40664e-06	1.92686	5.75843e-06	1.95402	4.3277e-06	1.64498	9.41403e-05	1.78602	2.41978e-05	1.75807	3.18072e-05	1.78704	2.39904e-05	1.68223	6.63304e-05	1.38812	0.00090856
PAS_chr4_0937	Ste12		hypothetical protein	MAPK signaling pathway - yeast	0.408843	0.32351	0.263963	0.523792	0.966989	0.020231	1.05963	0.0110412	0.947675	0.0228614	0.831289	0.0455605	0.766472	0.0649491	0.736272	0.0763215	0.840962	0.0429554	0.665343	0.10927	0.823434	0.0476464	0.437387	0.291896
PAS_chr3_0220	Bck1	PP7435_Chr3-1007	Mitogen-activated protein (MAP) kinase kinase kinase	MAPK signaling pathway - yeast||Mitophagy - yeast	0.120033	0.771883	0.208845	0.613109	0.588543	0.154886	0.437733	0.289531	0.422739	0.306612	0.599003	0.147773	0.203481	0.622717	0.489174	0.23692	0.670803	0.105019	0.5737	0.165851	0.668721	0.106354	0.184033	0.65683
PAS_chr1-4_0271	Mkk1	PP7435_Chr1-1051	Mitogen-activated kinase kinase involved in protein kinase C signaling pathway	MAPK signaling pathway - yeast||Mitophagy - yeast	0.0867056	0.834385	-1.31828	0.00169526	-0.156795	0.70529	-0.377682	0.361688	-0.321923	0.437208	-0.356473	0.389596	-0.126746	0.759914	-0.550227	0.184961	-0.315856	0.445157	-0.514817	0.215183	-0.46744	0.259685	-0.482443	0.245093
PAS_chr1-3_0232	Hog1	PP7435_Chr1-0238	Mitogen-activated protein kinase involved in osmoregulation via three independent osmosensors	MAPK signaling pathway - yeast||Mitophagy - yeast	0.105518	0.797638	-0.21401	0.60287	-0.140183	0.733507	-0.0602124	0.883922	-0.138335	0.73694	-0.104312	0.800117	-0.0560884	0.891857	-0.0310116	0.940321	-0.131078	0.75012	0.0844769	0.837604	-0.170545	0.678727	0.162822	0.692418
