# Supplementary material for: Transcriptomic Analysis of Pichia pastoris (Komagataella phaffii) GS115 During Heterologous Protein Production Using a High-Cell-Density Fed-Batch Cultivation Strategy
Source: Front Microbiol. 2020 Mar 20;11:463. doi: 10.3389/fmicb.2020.00463 (PMC7098997; doi:10.3389/fmicb.2020.00463)
Supplement: Supplementary file 4 [file Table_3.xlsx]

## Sheet: Sheet1
Table S3 the related genes involved in UPR and ERAD pathways
Gene_ID	Protein name	Hit to CBS7435_ORF	Description	Pathway	G_3vsB_10_log2FoldChange	G_3vsB_10_pvalue	GM_2vsB_10_log2FoldChange	GM_2vsB_10_pvalue	M_12vsB_10_log2FoldChange	M_12vsB_10_pvalue	M_24vsB_10_log2FoldChange	M_24vsB_10_pvalue	M_36vsB_10_log2FoldChange	M_36vsB_10_pvalue	M_48vsB_10_log2FoldChange	M_48vsB_10_pvalue	M_60vsB_10_log2FoldChange	M_60vsB_10_pvalue	M_72vsB_10_log2FoldChange	M_72vsB_10_pvalue	M_84vsB_10_log2FoldChange	M_84vsB_10_pvalue	M_96vsB_10_log2FoldChange	M_96vsB_10_pvalue	M_108vsB_10_log2FoldChange	M_108vsB_10_pvalue	M_120vsB_10_log2FoldChange	M_120vsB_10_pvalue
PAS_chr1-1_0381	HAC1	PP7435_Chr1-0700	bZIP transcription factor (ATF/CREB1 homolog) that regulates the unfolded protein response	NA	0.834382	0.0437767	1.43398	0.000617941	2.13429	6.10597e-07	1.58973	0.00015734	1.17053	0.00494315	0.844465	0.0413923	1.76096	3.10527e-05	1.98973	2.97341e-06	1.53785	0.00025095	1.73606	3.97364e-05	1.68473	6.49909e-05	1.91322	6.6714e-06
PAS_chr3_1104	Ire1	PP7435_Chr3-1369	Serine-threonine kinase and endoribonuclease	Protein processing in endoplasmic reticulum	0.0644169	0.876095	1.05308	0.0112225	0.826955	0.0457161	0.619022	0.133708	0.667546	0.106101	0.756582	0.0673064	0.435112	0.291137	0.565328	0.170719	0.65981	0.11004	0.729812	0.0775726	0.724779	0.0795435	0.539005	0.191498
PAS_chr4_0844	PDI	PP7435_Chr4-0107	Protein disulfide isomerase, multifunctional protein resident in the endoplasmic reticulum lumen	Protein processing in endoplasmic reticulum	0.157767	0.700734	0.540936	0.188617	1.02693	0.0132262	0.760575	0.0652807	0.29844	0.467469	0.221749	0.589155	0.520194	0.206071	0.724713	0.0788766	0.457639	0.265677	0.540445	0.189088	0.473956	0.249114	0.847105	0.0403441
PAS_chr1-3_0125	PDI	PP7435_Chr1-0128	Member of the protein disulfide isomerase (PDI) family	Protein processing in endoplasmic reticulum	-0.344976	0.403737	-0.887734	0.0326805	-1.00513	0.01602	-0.710244	0.0869791	-0.71623	0.0846429	-0.822221	0.048102	-0.828797	0.0462304	-0.62899	0.129489	-0.740036	0.0744898	-0.848962	0.0416198	-0.792073	0.0568276	-0.650826	0.117026
PAS_chr1-3_0053	Png1	PP7435_Chr1-0048	Conserved peptide N-glycanase required for deglycosylation of misfolded glycoproteins	Protein processing in endoplasmic reticulum	-0.00870067	0.985545	-0.516778	0.214983	1.01267	0.015328	0.877768	0.0352069	0.90061	0.0308778	0.94264	0.0239129	0.926638	0.0263022	1.0556	0.011574	0.949092	0.0228377	1.12613	0.00717058	1.00726	0.0159105	1.2097	0.00391371
PAS_chr3_0230	Hsp70	PP7435_Chr3-0996	ATPase involved in protein folding and the response to stress	Spliceosome||Protein processing in endoplasmic reticulum||Endocytosis	-1.24969	0.00268556	-1.88438	8.74245e-06	-1.61038	0.000127294	-0.202187	0.622164	0.630724	0.125551	-0.240929	0.557132	0.714832	0.0828728	0.117539	0.774458	-0.396243	0.334719	0.30313	0.460246	0.779799	0.0587466	1.63417	0.00010201
PAS_chr1-4_0130	Hsp90	PP7435_Chr1-0897	Heat shock protein Hsp90	Protein processing in endoplasmic reticulum	-1.11546	0.00720715	-1.86033	1.11974e-05	-1.40157	0.00079736	-0.791594	0.0550839	-0.385292	0.348232	-0.915619	0.026815	-0.541142	0.188311	-0.85351	0.0388108	-0.951393	0.021489	-0.646406	0.116522	-0.129303	0.75261	0.257357	0.530611
PAS_chr3_0850	PERK	PP7435_Chr3-0333	Protein kinase, phosphorylates the alpha-subunit of translation initiation factor eIF2 (Sui2p)	Autophagy - yeast||Protein processing in endoplasmic reticulum	0.0289204	0.945077	0.208639	0.613324	0.341881	0.408006	0.290974	0.48121	0.451309	0.274942	0.466197	0.259402	0.410081	0.320904	0.442164	0.284782	0.454957	0.270681	0.478961	0.246928	0.491415	0.234614	0.327145	0.428842
PAS_chr1-4_0629	Sec61	PP7435_Chr1-1440	Subunit of the Ssh1 translocon complex	Protein export||Protein processing in endoplasmic reticulum||Phagosome	-0.16889	0.681294	-0.632031	0.125447	-1.5007	0.000354382	-1.18719	0.00438938	-1.12602	0.0068359	-1.1452	0.00596285	-1.24734	0.00280116	-1.23542	0.00307534	-1.20539	0.00382984	-1.26303	0.00250229	-1.14653	0.00590989	-1.30783	0.00176406
PAS_chr4_0444	Hrd1	PP7435_Chr4-0536	Ubiquitin-protein ligase	Ubiquitin mediated proteolysis||Protein processing in endoplasmic reticulum	0.185894	0.65617	0.907251	0.0295638	1.44247	0.000619615	1.30145	0.00194736	1.23257	0.00337006	1.26769	0.00254221	1.46859	0.000494836	1.35816	0.00126242	1.31179	0.00178814	1.50186	0.000379153	1.33499	0.00151689	1.6634	8.89619e-05
PAS_chr3_1018	Hrd3	PP7435_Chr3-0152	Resident protein of the ER membrane that plays a central role in ER-associated protein degradation	Protein processing in endoplasmic reticulum	0.261933	0.528139	0.386246	0.351493	0.975017	0.0193918	0.629284	0.129819	0.48422	0.24394	0.472406	0.255555	0.42316	0.308162	0.523524	0.207792	0.424587	0.306153	0.384263	0.355812	0.442514	0.286969	0.293159	0.481314
PAS_chr2-1_0140	Kar1/BiP	PP7435_Chr2-1167	ATPase involved in protein import into the ER, also acts as a chaperone to mediate protein folding i	Protein export||Protein processing in endoplasmic reticulum	-0.326853	0.426096	-0.204083	0.619004	-0.0269672	0.947645	0.0992194	0.80894	-0.225567	0.582661	-0.784983	0.0571993	0.116493	0.776496	0.0372253	0.927751	-0.299784	0.465335	-0.1889	0.645365	0.246132	0.548774	0.565369	0.169477
PAS_chr2-1_0546	Derlin	PP7435_Chr2-0745	Hypothetical protein	Protein processing in endoplasmic reticulum	-0.116137	0.784297	-0.418052	0.31808	0.93511	0.02553	0.477547	0.252993	0.496143	0.234454	0.521435	0.211724	0.435691	0.297164	0.621313	0.13688	0.697158	0.0946909	0.858586	0.0407331	0.6178	0.139339	0.656148	0.117194
PAS_FragD_0026	Cdc48（p97）	PP7435_Chr4-0027	ATPase in ER, nuclear membrane and cytosol with homology to mammalian p97	Protein processing in endoplasmic reticulum	-0.0679334	0.868594	-0.0425058	0.917574	0.316262	0.441326	0.335136	0.414592	0.236693	0.564321	0.277225	0.499651	0.165266	0.687261	0.394297	0.337341	0.316692	0.440677	0.316853	0.440515	0.290466	0.479423	0.215752	0.599273
PAS_chr3_0538	Doa10	PP7435_Chr3-0666	Ubiquitin-protein ligase of the ER/nuclear envelope	Protein processing in endoplasmic reticulum	-0.173812	0.672924	-0.339184	0.410072	0.32948	0.423546	0.216492	0.598908	0.238533	0.562338	0.366142	0.373925	0.146123	0.722692	0.391939	0.341288	0.26103	0.525873	0.372794	0.365478	0.294726	0.474092	0.32864	0.424871
PAS_chr1-1_0437	Ubc6	PP7435_Chr1-0756	Ubiquitin-conjugating enzyme involved in ER-associated protein degradation	Ubiquitin mediated proteolysis||Protein processing in endoplasmic reticulum	0.0885056	0.830075	0.447848	0.276949	0.380288	0.356005	0.251075	0.542101	0.121442	0.768407	0.138388	0.737115	0.0492977	0.905165	0.180813	0.660843	0.23288	0.571678	0.229919	0.576963	0.261746	0.525208	0.527723	0.200803
PAS_chr3_0924	Ubc7	PP7435_Chr3-1633	Hypothetical protein	Ubiquitin mediated proteolysis||Protein processing in endoplasmic reticulum	-0.0790847	0.849258	-0.580726	0.161272	-0.0627337	0.880747	0.00742408	0.986984	0.12415	0.764958	0.0411355	0.922028	0.29978	0.468609	0.260725	0.528863	0.204485	0.621109	0.102419	0.805675	0.153994	0.710433	0.520652	0.208679
PAS_chr3_0249	Cue1	PP7435_Chr3-0973	Ubiquitin conjugating enzyme, involved in the ER-associated protein degradation pathway	Protein processing in endoplasmic reticulum	-0.505111	0.22454	-0.422624	0.308724	-0.536841	0.197846	-0.349324	0.401105	-0.364734	0.381392	-0.371513	0.372485	-0.344016	0.408377	0.0592268	0.888186	0.0337086	0.936743	-0.0278406	0.948883	-0.130801	0.754417	0.124292	0.766031
PAS_chr3_0077	eIF2a	PP7435_Chr3-1159	Alpha subunit of the translation initiation factor eIF2, involved in the identification of the start	RNA transport||Autophagy - yeast||Protein processing in endoplasmic reticulum	-0.514951	0.211097	-1.19278	0.00417306	-1.65762	8.47159e-05	-1.49583	0.000365198	-1.39253	0.000880434	-1.24335	0.00287293	-1.07098	0.00993774	-1.2111	0.00366426	-1.19298	0.00417498	-1.50785	0.000331557	-1.34865	0.00125975	-1.45388	0.00052751
PAS_chr4_0156	Hrd1	PP7435_Chr4-0859	Ubiquitin-protein ligase	Ubiquitin mediated proteolysis||Protein processing in endoplasmic reticulum	0.423334	0.304986	0.832011	0.0445714	1.05873	0.0109218	0.678463	0.100953	0.388791	0.34651	0.541466	0.190122	0.342898	0.40616	0.499902	0.226336	0.417037	0.312265	0.552471	0.181545	0.37169	0.368123	0.338845	0.412111
