# Supplementary material for: Transcriptomic Analysis of Pichia pastoris (Komagataella phaffii) GS115 During Heterologous Protein Production Using a High-Cell-Density Fed-Batch Cultivation Strategy
Source: Front Microbiol. 2020 Mar 20;11:463. doi: 10.3389/fmicb.2020.00463 (PMC7098997; doi:10.3389/fmicb.2020.00463)
Supplement: Supplementary file 5 [file Table_4.xlsx]

## Sheet: Sheet1
Table S4 the related genes involved in the autophagy pathway
Gene_ID	Protein name	Hit to CBS7435_ORF	Description	Pathway	G_3vsB_10_log2FoldChange	G_3vsB_10_pvalue	GM_2vsB_10_log2FoldChange	GM_2vsB_10_pvalue	M_12vsB_10_log2FoldChange	M_12vsB_10_pvalue	M_24vsB_10_log2FoldChange	M_24vsB_10_pvalue	M_36vsB_10_log2FoldChange	M_36vsB_10_pvalue	M_48vsB_10_log2FoldChange	M_48vsB_10_pvalue	M_60vsB_10_log2FoldChange	M_60vsB_10_pvalue	M_72vsB_10_log2FoldChange	M_72vsB_10_pvalue	M_84vsB_10_log2FoldChange	M_84vsB_10_pvalue	M_96vsB_10_log2FoldChange	M_96vsB_10_pvalue	M_108vsB_10_log2FoldChange	M_108vsB_10_pvalue	M_120vsB_10_log2FoldChange	M_120vsB_10_pvalue
PAS_chr2-1_0641	ATG1	PP7435_Chr2-0639	Protein serine/threonine kinase required for vesicle formation in autophagy	Autophagy - other||Autophagy - yeast||Mitophagy - yeast	0.389829	0.344059	-0.510676	0.215932	1.37991	0.000973695	0.943635	0.0228563	1.65789	8.382e-05	1.9748	3.48714e-06	2.15782	4.6868e-07	2.21386	2.48131e-07	1.74585	3.59752e-05	1.67581	7.09032e-05	1.70743	5.23305e-05	1.54919	0.00022771
PAS_chr2-1_0672	ATG17	PP7435_Chr2-0609	Scaffold protein responsible for pre-autophagosomal structure organization	Autophagy - yeast	0.105151	0.806427	0.326491	0.438052	0.811285	0.0545652	0.471451	0.264046	0.561977	0.183747	0.468162	0.270013	0.379483	0.371302	0.752664	0.0756279	0.854973	0.0428344	0.89781	0.034194	0.753774	0.0753596	1.11335	0.00875386
PAS_chr2-1_0557	TOR	PP7435_Chr2-0732	PIK-related protein kinase and rapamycin target	Autophagy - other||Autophagy - yeast||Mitophagy - yeast	-0.00318902	0.994339	0.58482	0.156106	0.773575	0.0613326	0.808652	0.0505645	0.995349	0.0164423	0.941414	0.0231389	0.988658	0.0171524	1.01539	0.0144312	0.853927	0.0390668	1.13712	0.0062796	1.08538	0.00901317	1.37283	0.00102984
PAS_chr3_0964	PKA	PP7435_Chr3-0207	cAMP-dependent protein kinase catalytic subunit	Meiosis - yeast||Autophagy - yeast	0.291406	0.480729	-0.25074	0.544415	1.01393	0.0148175	0.810393	0.0507205	0.737279	0.0753533	0.924971	0.0260236	0.647097	0.118097	0.919692	0.0268884	0.94863	0.0224155	1.02632	0.0137158	0.95209	0.0220204	1.00447	0.0158048
PAS_chr3_0893	Sch9	PP7435_Chr3-0282	Protein kinase involved in transcriptional activation of osmostress-responsive genes	Autophagy - yeast	0.161644	0.695687	2.48637	9.84032e-09	0.642277	0.120578	1.42924	0.000653942	0.959257	0.0209546	0.845161	0.0415768	1.23827	0.00302048	0.941341	0.0234341	1.31831	0.00161952	0.878418	0.0343473	1.09917	0.00831084	1.11822	0.00728697
PAS_chr4_0510	ATG9	PP7435_Chr4-0468	Transmembrane protein involved in formation of Cvt and autophagic vesicles	Autophagy - other||Autophagy - yeast	0.573026	0.16596	0.384621	0.351827	1.7654	3.05574e-05	1.27672	0.00226374	1.21777	0.00355671	1.39425	0.000884739	1.06256	0.0107204	1.39332	0.000892213	1.39775	0.00085562	1.45632	0.000527141	1.35552	0.00121569	1.30326	0.00184926
PAS_chr1-3_0168	ATG2	PP7435_Chr1-1752	Peripheral membrane protein required for vesicle formation	Autophagy - other||Autophagy - yeast	0.31505	0.447654	0.843968	0.0423491	1.73569	4.21e-05	1.45865	0.000526317	1.65797	8.85829e-05	1.73104	4.41071e-05	1.46208	0.000511412	1.77615	2.84181e-05	1.74033	4.00063e-05	1.81752	1.89472e-05	1.84742	1.39341e-05	1.73456	4.28269e-05
PAS_chr3_0148	RIM15	PP7435_Chr3-1088	Glucose-repressible protein kinase involved in signal transduction during cell proliferation in resp	Meiosis - yeast||Autophagy - yeast	-0.275351	0.504989	0.610042	0.139717	1.11087	0.00762642	0.94198	0.0232345	1.05645	0.0110938	1.07299	0.00991309	0.754534	0.0683477	0.943346	0.023078	1.04881	0.0116432	1.14088	0.00618873	1.14186	0.00613181	1.03008	0.0132487
PAS_chr1-4_0339	Gcn4	PP7435_Chr1-1124	Transcriptional activator	Autophagy - yeast	0.140236	0.732594	0.43206	0.293158	-0.261846	0.523714	0.213346	0.60327	0.74198	0.0720447	0.689569	0.0943312	1.32604	0.0014798	1.07244	0.00973124	0.741794	0.0721013	0.671042	0.103449	0.809246	0.0500007	1.079	0.00930388
PAS_chr4_0704	ATG8	PP7435_Chr4-0258	Conserved protein that is a component of autophagosomes and Cvt vesicles	Autophagy - other||Autophagy - yeast||Mitophagy - yeast	0.867802	0.036249	0.0560661	0.892403	1.69411	5.99787e-05	1.35666	0.00118554	1.6308	0.000109019	1.77999	2.60406e-05	1.93009	5.63995e-06	2.17713	3.81565e-07	1.79149	2.31586e-05	2.12168	7.13536e-07	1.82579	1.6493e-05	2.31236	7.99711e-08
PAS_chr1-4_0310	ATG7	PP7435_Chr1-1096	Autophagy-related protein	Autophagy - other||Autophagy - yeast	0.581702	0.160724	0.222683	0.591286	2.29128	1.07226e-07	1.67068	7.78189e-05	1.84437	1.42895e-05	2.01991	2.2769e-06	1.536	0.000267278	1.92721	6.09619e-06	1.92438	6.22981e-06	2.10463	9.07221e-07	1.95138	4.73099e-06	2.09455	1.01227e-06
PAS_chr1-4_0522	ATG4	PP7435_Chr1-3061	Conserved cysteine protease required for autophagy	Autophagy - other||Autophagy - yeast	0.424373	0.30547	-0.335108	0.419116	1.38992	0.000928827	0.977116	0.018945	0.997114	0.016722	1.13162	0.00673369	0.896913	0.0310568	1.141	0.00630499	1.08791	0.0090865	1.42264	0.000712273	1.07964	0.00967119	1.41705	0.000745084
PAS_chr1-1_0226	PRB1	PP7435_Chr1-0540	Vacuolar proteinase B (yscB), a serine protease of the subtilisin family	Autophagy - yeast	0.742363	0.0720352	1.91916	6.14171e-06	2.89742	4.76395e-11	2.48028	1.02272e-08	2.55563	4.01674e-09	2.71818	5.06349e-10	2.5455	4.5573e-09	2.83711	1.06478e-10	2.82647	1.22539e-10	2.88896	5.33843e-11	2.83009	1.16864e-10	2.6219	1.74226e-09
PAS_chr1-1_0465	ATG15	PP7435_Chr1-0326	hypothetical protein	Glycerolipid metabolism||Metabolic pathways||Autophagy - yeast	0.496383	0.228915	-0.280177	0.496975	1.25135	0.00271583	0.932191	0.0246172	0.995066	0.0165808	1.12903	0.00669126	1.00358	0.0156705	1.20871	0.00375075	1.27835	0.00220069	1.27778	0.00222201	1.19681	0.00409711	1.24077	0.0029504
PAS_chr1-1_0353	ATG22	PP7435_Chr1-0671	Vacuolar integral membrane protein	Autophagy - yeast	0.602659	0.146296	-1.07607	0.0103565	1.06715	0.0105761	0.776704	0.061706	0.893043	0.0320255	0.969395	0.0200559	0.835824	0.0445184	0.99062	0.0175397	1.06374	0.0107738	1.34305	0.00138142	1.16862	0.00520698	1.2259	0.00342447
PAS_chr2-2_0350	Vam3	PP7435_Chr2-0371	Target membrane receptor (t-SNARE)	SNARE interactions in vesicular transport||Autophagy - yeast	0.218387	0.599306	0.0760747	0.855866	1.01208	0.0153111	0.766772	0.0652839	0.812609	0.0510301	0.768607	0.0648077	0.780549	0.0606525	1.01132	0.0154193	0.928369	0.0258377	1.20111	0.00415123	0.98643	0.0180962	1.06379	0.010926
PAS_chr2-1_0644	Sec17	PP7435_Chr2-0636	Peripheral membrane protein required for vesicular transport between ER and Golgi	Autophagy - yeast	-0.0483523	0.906858	0.469978	0.253839	1.08236	0.00919025	0.922853	0.0259084	0.823321	0.0465794	0.844767	0.0412155	0.875836	0.0343736	1.03603	0.0125807	0.931654	0.0245299	1.04301	0.0120219	0.906748	0.0286008	1.18744	0.00435454
PAS_chr4_0899	Ypt7	PP7435_Chr4-0052	GTP-binding protein	Autophagy - yeast||Endocytosis||Phagosome	0.434754	0.291194	0.276678	0.501395	0.624553	0.130185	0.719682	0.0814824	0.803605	0.0520446	0.836612	0.0432114	0.683997	0.0976311	0.848184	0.0404435	0.923878	0.0257453	1.03817	0.0124269	0.867062	0.0362412	1.06375	0.0104573
PAS_chr1-4_0606	Vps8	PP7435_Chr1-1415	Membrane-associated protein	Autophagy - yeast	-0.308831	0.456759	-0.391603	0.345006	-0.40124	0.334653	-0.444077	0.28541	-0.322897	0.4377	-0.61647	0.139242	-0.703482	0.0916154	-0.700241	0.093544	-0.619584	0.136441	-1.13028	0.00737628	-0.658529	0.114533	-1.02873	0.0146149
PAS_chr1-1_0460	Vps39（Vam6）	PP7435_Chr1-0295	Vacuolar protein that plays a critical role in the tethering steps of vacuolar membrane fusion by facilitating guanine nucleotide exchange on small guanosine triphosphatase Ypt7p	Autophagy - yeast	0.156874	0.706523	-0.111207	0.790134	-0.397169	0.341945	-0.652213	0.118519	-0.804349	0.0558354	-0.67463	0.107676	-0.789015	0.0599221	-0.772686	0.0655911	-0.696902	0.0956113	-1.0462	0.0135435	-0.779466	0.0634734	-1.52194	0.0003924
PAS_chr3_0733	LCB1/2	PP7435_Chr3-0462	Component of serine palmitoyltransferase	Sphingolipid metabolism||Metabolic pathways||Autophagy - yeast	0.0462925	0.910787	-0.0295136	0.943196	-0.640642	0.121151	-0.533544	0.196095	-0.628375	0.12846	-0.620524	0.133233	-0.708221	0.0868609	-0.898408	0.0304348	-0.723016	0.0804268	-0.979392	0.0185443	-0.867587	0.0365004	-1.02337	0.0139457
PAS_chr1-4_0119	Tap42	PP7435_Chr1-2731	Essential protein involved in the TOR signaling pathway	Autophagy - other||Autophagy - yeast	-0.022194	0.959209	-0.871458	0.0372371	-0.801669	0.0561471	-0.700867	0.0933758	-0.855103	0.0417114	-0.960211	0.0227157	-0.814702	0.0520912	-0.730814	0.0815288	-0.853949	0.0412329	-1.03427	0.0145687	-1.07443	0.0109372	-0.685966	0.101376
PAS_chr1-4_0555	ATG11	PP7435_Chr1-1358	Adapter protein for pexophagy and the cytoplasm-to-vacuole targeting (Cvt) pathway	Autophagy - other||Autophagy - yeast||Mitophagy - yeast	-0.0272831	0.948056	1.45791	0.000508054	1.13283	0.00652602	0.959639	0.0207922	1.00204	0.0158845	1.09553	0.00848243	0.721634	0.0811286	0.983402	0.0179132	1.06293	0.0105769	1.04142	0.0122844	1.12004	0.00715058	0.910802	0.028181
PAS_chr2-2_0343	AVT3/4	PP7435_Chr2-0363	Vacuolar transporter, exports large neutral amino acids from the vacuole	Autophagy - yeast	0.398398	0.332857	0.473685	0.249788	1.13909	0.0061465	1.1772	0.00466396	1.17917	0.00460039	1.13022	0.00654884	1.02449	0.0135147	0.899761	0.029721	0.95321	0.0213791	1.15823	0.00536236	1.02867	0.0131537	0.978519	0.0182402
PAS_chr1-1_0097	PCL5	PP7435_Chr1-0400	Cyclin, interacts with Pho85p cyclin-dependent kinase (Cdk), induced by Gcn4p at level of transcript	Autophagy - yeast	0.422361	0.304241	-1.72313	4.45203e-05	-1.0578	0.0108186	-0.295668	0.471791	0.656716	0.11105	0.88036	0.0332332	1.812	1.83389e-05	1.28312	0.00208203	0.61068	0.138142	0.406238	0.323116	0.508072	0.2169	0.712827	0.0839305
